# Supplementary material for: Implementation of Age-Specific Services for Transition-Age Youths in California
Source: Atypon-hosted journal article supplement (doi:10.1176/appi.ps.201500084), 2016-05-02
Supplement: appi.ps.201500084.ds001.pdf [file appi.ps.201500084.ds001.pdf]

**Appendix Table 1:** Transition-Age Youth Programs, County Interviews, and Program Survey Response Rates by County

| <b>County</b> | <b>Transition-Age Youth Programs</b> | <b>County Interview</b> | <b>Transition-Age Youth Program Surveys</b> | <b>Transition-Age Youth Program Response Rate</b> |
|---------------|--------------------------------------|-------------------------|---------------------------------------------|---------------------------------------------------|
| Alameda       | 4                                    | 1                       | 2                                           | 50%                                               |
| Alpine        | 0                                    |                         |                                             |                                                   |
| Amador        | 0                                    |                         |                                             |                                                   |
| Berkeley City | 3                                    | 1                       | 3                                           | 100%                                              |
| Butte         | 5                                    | 1                       | 4                                           | 80%                                               |
| Calaveras     | 1                                    | 1                       | 0                                           | 0%                                                |
| Colusa        | 0                                    |                         |                                             |                                                   |
| Contra Costa  | 10                                   | 1                       | 8                                           | 80%                                               |
| Del Norte     | 1                                    | 1                       | 1                                           | 100%                                              |
| El Dorado     | 1                                    | 1                       | 0                                           | 0%                                                |
| Fresno        | 3                                    | 1                       | 3                                           | 100%                                              |
| Glenn         | 1                                    | 1                       | 1                                           | 100%                                              |
| Humboldt      | 1                                    | 1                       | 1                                           | 100%                                              |
| Imperial      | 1                                    | 1                       | 0                                           | 0%                                                |
| Inyo          | 1                                    | 1                       | 1                                           | 100%                                              |
| Kern          | 3                                    | 1                       | 3                                           | 100%                                              |
| Kings         | 0                                    |                         |                                             |                                                   |

|                |     |   |    |      |
|----------------|-----|---|----|------|
| Lake           | 2   | 0 | 1  | 50%  |
| Lassen         | 0   |   |    |      |
| Los Angeles    | 145 | 1 | 59 | 41%  |
| Madera         | 1   | 1 | 1  | 100% |
| Marin          | 2   | 1 | 2  | 100% |
| Mariposa       | 0   |   |    |      |
| Mendocino      | 1   | 0 | 1  | 100% |
| Merced         | 4   | 1 | 4  | 100% |
| Modoc          | 0   |   |    |      |
| Mono           | 0   |   |    |      |
| Monterey       | 1   | 1 | 1  | 100% |
| Napa           | 1   | 1 | 1  | 100% |
| Nevada         | 3   | 1 | 2  | 67%  |
| Orange         | 4   | 1 | 5  | 125% |
| Placer         | 1   | 1 | 0  | 0%   |
| Plumas         | 0   |   |    |      |
| Riverside      | 10  | 1 | 10 | 100% |
| Sacramento     | 3   | 1 | 0  | 0%   |
| San Benito     | 1   | 0 | 1  | 100% |
| San Bernardino | 15  | 1 | 7  | 47%  |
| San Diego      | 31  | 1 | 29 | 94%  |
| San            | 4   | 1 | 4  | 100% |

|             |   |   |   |      |
|-------------|---|---|---|------|
| Francisco   |   |   |   |      |
| San Joaquin | 3 | 1 | 3 | 100% |
| San Luis    |   |   |   |      |
| Obispo      | 3 | 1 | 2 | 67%  |
| San Mateo   | 2 | 1 | 1 | 50%  |
| Santa       |   |   |   |      |
| Barbara     | 2 | 1 | 1 | 50%  |
| Santa Clara | 5 | 1 | 3 | 60%  |
| Santa Cruz  | 1 | 0 | 1 | 100% |
| Shasta      | 1 | 1 | 1 | 100% |
| Sierra      | 1 | 1 | 0 | 0%   |
| Siskiyou    | 0 |   |   |      |
| Solano      | 2 | 1 | 2 | 100% |
| Sonoma      | 1 | 0 | 0 | 0%   |
| Stanislaus  | 1 | 1 | 1 | 100% |
| Sutter-Yuba | 1 | 1 | 1 | 100% |
| Tehama      | 1 | 0 | 0 | 0%   |
| Tri-City    | 1 | 0 | 1 | 100% |
| Trinity     | 0 |   |   |      |
| Tulare      | 3 | 1 | 3 | 100% |
| Tuolumne    | 2 | 0 | 1 | 50%  |
| Ventura     | 4 | 1 | 4 | 100% |
| Yolo        | 1 | 0 | 0 | 0%   |

|              |     |    |     |     |
|--------------|-----|----|-----|-----|
| <b>Total</b> | 298 | 39 | 180 | 60% |
|--------------|-----|----|-----|-----|
